# Supplementary material
Source: PubMed Central journal article supplement (PMC3435135)
Supplement: chest_142_3_614_ds01.pdf [file chest_142_3_614_ds01.pdf]

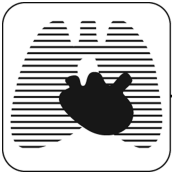

# Correlation of Cough With Disease Activity and Treatment With Cyclophosphamide in Scleroderma Interstitial Lung Disease

## Findings From the Scleroderma Lung Study

*Arthur C. Theodore, MD; Chi-Hong Tseng, PhD; Ning Li, PhD; Robert M. Elashoff, PhD; and Donald P. Tashkin, MD, FCCP*

### e-Appendix 1.

#### SLS Participants

**SLS Research Group: UCLA (National Heart, Lung, and Blood Institute [NHLBI] grants UO1 HL 60587 and UO1 HL 60606). UCLA Medical Institutional Review Board, Protocol 97-11-050.**

Philip J. Clements, MD, MPH; Donald P. Tashkin, MD; Robert Elashoff, PhD; Jonathan Goldin, MD, PhD; Michael Roth, MD; Daniel Furst, MD; Ken Bulpitt, MD; Dinesh Khanna, MD; Wen-Ling Joanie Chung, MPH; Sherrie Viasco, RN; Mildred Sterz, RN, MPH; Lovlette Woolcock, LVN; Xiaohong Yan, MS; Judy Ho, BS; Sarinnapha Vasunilashorn, BS; and Irene da Costa, MS.

**University of Medicine and Dentistry of New Jersey, New Brunswick, NJ (NHLBI grant UO1 HL 60550). UMDNJ Robert Wood Johnson Medical School Institutional Review Board, Protocol 2808.**

James R. Seibold, MD (currently at: University of Michigan Scleroderma Program, Ann Arbor, MI); David J. Riley, MD; Judith K. Amorosa, MD; Vivien M. Hsu, MD; Deborah A. McCloskey, BSN; and Julianne E. Wilson, RN.

**University of Illinois Chicago, Chicago, IL (NHLBI grant UO1 HL 60895). University of Illinois at Chicago Institutional Review Board, Protocol 1998-0053.**

John Varga, MD; Dean Schraugnel, MD; Andrew Wilbur, MD; David Lapota, MD; Shiva Arami, MD; and Patricia Cole-Saffold, MS.

**Boston University, Boston, MA (NHLBI grant UO1 HL 60682). Boston University Medical Center Institutional Review Board, Protocol H-23508.**

Arthur Theodore, MD; Robert Simms, MD; Peter Clarke, MD; Joseph Korn, MD; Kimberley Tobin, BS; and Melynn Nuite, BSN.

*Online supplements are not copyedited prior to posting.*



**Medical University of South Carolina, Charleston, SC (NHLBI grant UO1 HL 60750). MUSC Institutional Review Board for Human Research, Protocol HR 7494.**

Richard Silver, MD; Marcie Bolster, MD; Charlie Strange, MD; Steve Schabel, MD; Edwin Smith, MD; June Arnold, BS; Katie Caldwell, MS; and Michael Bonner, BS.

**Johns Hopkins School of Medicine, Baltimore, MD (NHLBI grant UO1 HL 60597). Johns Hopkins Institutional Review Board #5, Protocol HBV97-10-01-03.**

Robert Wise, MD; Fred Wigley, MD; Barbara White, MD; Laura Hummers, MD; Mark Bohlman, MD; Albert Polito, MD; Gwen Leatherman, MSN; Edrick Forbes, RN; and Marie Daniel, BS.

**Georgetown University, Washington, DC (NHLBI grant UO1 HL 60794). Georgetown University Institutional Review Board, Protocol 97-317.**

Virginia Steen, MD; Charles Read, MD; Cirrelda Cooper, MD; Sean Wheaton, MD; Anise Carey, BS; and Adriana Ortiz, BS.

**University of Texas Houston, Houston, TX (NHLBI grant UO1 HL 60839). The University of Texas Health Science Center at Houston Institutional Review Board.**

Maureen Mayes, MD, MPH; Ed Parsley, DO; Sandra Oldham, MD; Tan Filemon, MD; Samantha Jordan, RN; and Marilyn Perry, BS.

**University of California San Francisco, San Francisco, CA (NHLBI grant UO1 HL 60587). UCSF Committee on Human Research, Protocol H7152-20158.**

Kari Connolly, MD; Jeffrey Golden, MD; Paul Wolters, MD; Richard Webb, MD; John Davis, MD; Christine Antolos, BS; and Carla Maynetto, BS.

**University of Alabama, Birmingham, AL (NHLBI grant UO1 HL 60748). University of Alabama Institutional Review Board, Protocol F971118007.**

Barri Fessler, MD; Mitchell Oلمان, MD; Colleen Sanders, MD; Louis Heck, MD; and Tina Parkhill, BS.

**University of Connecticut Health Center, Farmington, CT (NHLBI grant UO1 HL 60587). University of Connecticut Institutional Review Board.**

Naomi Rothfield, MD; Mark Metersky, MD; Richard Cobb, MD; Macha Aberles, MD; Fran Ingenito, RN; and Elena Breen, MLT.

*Online supplements are not copyedited prior to posting.*



**Wayne State University, Detroit, MI (NHLBI grant UO1 HL 60839). Wayne State University Human Investigation Committee.**

Maureen Mayes, MD; Kamal Mubarak, MD; Jose L. Granda, MD; Joseph Silva, MD; Zora Injic, RN, MS; and Ronika Alexander, RN.

**Virginia Mason Research Center, Seattle, WA (NHLBI grant UO1 HL 60823).**

**Benaroya Research Institute at Virginia Mason Institutional Review Board.**

Daniel Furst, MD; Steven Springmeyer, MD; Steven Kirkland, MD; Jerry Molitor, MD; Richard Hinke, MD; and Amanda Mondt, RN.

### **Data Safety and Monitoring Board Members**

Taylor Thompson, MD (Harvard Medical School, Boston, MA); Sharon Rounds, MD (Veterans Affairs Medical Center, Brown University, Providence, RI); Michael Weinstein, MD (Cedars Sinai/UCLA, Los Angeles, CA); and Bruce Thompson, PhD (Clinical Trials Surveys, Baltimore, MD).

### **Mortality and Morbidity Review Committee Members**

Harold Paulus, MD (UCLA); Steven Levy, MD (UCLA); and Donald Martin, MD (Johns Hopkins University).



### e-Table 1.

#### **SLS Inclusion Criteria**

- SSc as defined by the American College of Rheumatology (E1), and classified as either limited or diffuse
- Onset of their first non-Raynaud's manifestation within the last 7 years
- FVC >45% and <85% predicted
- Exertional dyspnea > Grade II according to the Magnitude of Task component of the Mahler Baseline Dyspnea Index (BDI)
- Evidence of active alveolitis defined by neutrophilia (>3%) and/or eosinophilia (>2%) on bronchoalveolar lavage (BAL) and/or the presence of any groundglass opacity (GGO; hazy parenchymal opacity through which normal lung markings can be seen) on thoracic HRCT images, irrespective of the additional presence of evidence of fibrosis or honeycombing

#### **SLS Exclusionary Criteria**

- Single-breath diffusing capacity of the lung for carbon monoxide (DLCO) <30% predicted
- Forced expiratory volume of the lung during the first second (FEV1)/FVC ratio <65%
- Smoking within the past 6 months
- Significant pulmonary pathology other than interstitial lung disease on HRCT
- Pulmonary hypertension deemed to be clinically significant or requiring drug therapy
- Unexplained hematuria (>10 RBC/hpf; hematologic abnormalities (<4000 WBC/mm<sup>3</sup>, <150,000 platelets/mm<sup>3</sup>)
- Serum creatinine > 2.0 mg/dl
- Pregnancy or unwillingness to utilize appropriate contraceptive measures
- Other serious concomitant medical illness
- Medication exclusions included >10 mg/day of prednisone, prior treatment with cyclophosphamide (CYC) that exceeded 4 weeks of oral drug or 2 intravenous doses, or recent use of other potentially disease-modifying medications (azathioprine, methotrexate, D-penicillamine, etc.)



**e-Table 2.** \*Baseline characteristics of participants randomized into the scleroderma lung study who had 24 month evaluable data

|                                | All<br>(n = 145) | CYC<br>(n = 73) | Placebo<br>(n = 72) | P Value<br>(CYC vs. Placebo) |
|--------------------------------|------------------|-----------------|---------------------|------------------------------|
| Age, yr                        | 47.9 ± 1.0       | 47.9 ± 1.3      | 47.8 ± 1.5          | 0.9322                       |
| Female, %                      | 69.7             | 76.7            | 62.5                | 0.0627                       |
| SSc duration, yr               | 3.2 ± 0.2        | 3.3 ± 0.3       | 3.1 ± 0.2           | 0.5974                       |
| With diffuse SSc, %            | 62.1             | 63.0            | 61.1                | 0.8134                       |
| FVC, % predicted               | 67.9 ± 0.9       | 67.6 ± 1.3      | 68.3 ± .5           | 0.7250                       |
| FEV <sub>1</sub> /FVC, %       | 82.9 ± 0.7       | 82.8 ± 1.0      | 83.1 ± 0.9          | 0.8038                       |
| TLC, % predicted               | 69.0 ± 1.1       | 69.4 ± 1.5      | 68.7 ± 1.5          | 0.7308                       |
| FRC, % predicted               | 73.3 ± 1.6       | 74.6 ± 2.1      | 71.9 ± 2.3          | 0.3905                       |
| DL <sub>CO</sub> , % predicted | 46.9 ± 1.2       | 47.1 ± 1.5      | 45.8 ± 1.5          | 0.5356                       |
| Mahler BDI focal score (0–12)  | 5.6 ± 0.2        | 5.6 ± 0.22      | 5.6 ± 0.23          | 0.8504                       |
| Skin score (range, 0–51)       | 15.2 ± 0.9       | 15.9 ± 1.3      | 14.5 ± 1.2          | 0.4232                       |
| Diffuse SSc                    | 20.9 ± 1.0       | 21.7 ± 1.5      | 20.2 ± 1.4          | 0.4619                       |
| Limited SSc                    | 5.9 ± 0.5        | 6.1 ± 0.7       | 5.7 ± 0.6           | 0.6969                       |
| HAQ-DI (range, 0–3)            | 0.82 ± 0.06      | 0.96 ± 0.08     | 0.68 ± 0.08         | 0.0131                       |

The mean time from diagnosis to study entry was 3.2 +/- 0.2 SEM years)

*Definition of abbreviations:* BDI = baseline dyspnea index; CYC = cyclophosphamide; DL<sub>CO</sub> = diffusing capacity of carbon monoxide; HAQ-DI = Health Assessment Questionnaire–Disability Index; SSc = systemic sclerosis.

Plus/minus values represent means (±SEM).

\*Reprinted with permission from Clements PJ, Roth MD, Elashoff R, et al; Scleroderma Lung Study Group. Scleroderma lung study (SLS): differences in the presentation and course of patients with limited versus diffuse systemic sclerosis. *Ann Rheum Dis* 2007; 66(12):1641-7.



**e-Table 3.** Correlation of phlegm production with other baseline variables

|                   |         | None<br>(n = 41) |       | Occasional<br>(n = 63) |       | Frequent<br>(n = 10) |       | p value*    |
|-------------------|---------|------------------|-------|------------------------|-------|----------------------|-------|-------------|
|                   |         | Mean             | S.D.  | Mean                   | S.D.  | Mean                 | S.D.  |             |
| PFTs              | FVC     | 67.22            | 13.19 | 69.04                  | 12.66 | 61.52                | 12.72 | 0.71        |
|                   | TLC     | 69.68            | 13.07 | 70.04                  | 11.89 | 66.7                 | 15.35 | 0.62        |
|                   | DICO    | 43.31            | 13.27 | 47.41                  | 13.29 | 43.63                | 11.8  | 0.26        |
| Health Perception | PCS     | 31.64            | 9.8   | 31.76                  | 11.2  | 29.59                | 7.17  | 0.57        |
|                   | MCS     | 51.84            | 9.66  | 49.07                  | 10.22 | 44.67                | 10.65 | 0.06        |
|                   | BDI     | 6                | 1.77  | 5.89                   | 1.73  | 5.7                  | 1.7   | 0.67        |
|                   | HAQ     | 0.87             | 0.71  | 0.86                   | 0.71  | 0.75                 | 0.65  | 0.82        |
| HRCT              | MaxFib  | 1.97             | 1.03  | 2.18                   | 0.99  | 2.2                  | 1.03  | 0.39        |
|                   | MaxGG   | 0.61             | 0.72  | 0.79                   | 0.84  | 0.3                  | 0.67  | 0.85        |
|                   | MaxHC   | 47%              |       | 38%                    |       | 10%                  |       |             |
| BAL               | PMN     | 5.2              | 5.72  | 6.37                   | 5.61  | 16.01                | 15.52 | <b>0.01</b> |
|                   | Eos     | 2.58             | 2.98  | 2.76                   | 4.58  | 3.11                 | 2.72  | 0.94        |
| Clinical          | Rodnan  | 15.34            | 10.26 | 12.6                   | 10.73 | 13.3                 | 10.11 | 0.13        |
|                   | Diffuse | 63%              |       | 49%                    |       | 40%                  |       | 0.82        |
|                   | GERD    | 50%              |       | 57%                    |       | 67%                  |       | 0.93        |
|                   | PPI use | 54%              |       | 52%                    |       | 40%                  |       | 0.59        |

*Online supplements are not copyedited prior to posting.*



**e-Table 4.** Changes in Cough severity, frequency and phlegm production at 12 and 18 months in patients with and without GERD at baseline

| Cough     | GERD   | N   | variable | N  | mean  | stdev | p-value |
|-----------|--------|-----|----------|----|-------|-------|---------|
| Severity  | 1. YES | 106 | d12      | 89 | -0.08 | 0.84  | 0.84    |
|           |        |     | d18      | 66 | -0.15 | 0.88  | 0.36    |
|           | 2. NEW | 7   | d12      | 6  | -0.17 | 0.41  |         |
|           |        |     | d18      | 6  | 0.17  | 1.17  |         |
|           | 3. NO  | 44  | d12      | 30 | -0.17 | 0.91  |         |
|           |        |     | d18      | 19 | 0.16  | 0.83  |         |
| Frequency | 1. YES | 106 | d12      | 88 | -0.07 | 0.88  | 0.86    |
|           |        |     | d18      | 65 | -0.2  | 0.96  | 0.35    |
|           | 2. NEW | 7   | d12      | 6  | 0     | 0.63  |         |
|           |        |     | d18      | 6  | 0     | 1.1   |         |
|           | 3. NO  | 44  | d12      | 29 | -0.21 | 1.05  |         |
|           |        |     | d18      | 18 | 0.11  | 0.76  |         |
| Phlegm    | 1. YES | 106 | d12      | 89 | -0.03 | 0.97  | 0.83    |
|           |        |     | d18      | 66 | -0.09 | 1.05  | 0.42    |
|           | 2. NEW | 7   | d12      | 6  | 0     | 0.63  |         |
|           |        |     | d18      | 6  | -0.33 | 1.86  |         |
|           | 3. NO  | 44  | d12      | 30 | -0.2  | 1.06  |         |
|           |        |     | d18      | 19 | 0.21  | 1.18  |         |

'YES' includes subjects with GERD at baseline, 'NEW' includes subjects developed GERD, and 'NO' includes subjects without GERD throughout the study. The variable d12 gives change from baseline to 12 months, and d18 gives change from baseline to 18 months. The p-values are for the comparison among 3 GERD groups for 12 months change and 18 months change in severity, frequency and phlegm cough score.



**e-Table 5.** Association between ACE inhibitors and ARB agents and cough at baseline

|                               | Cough  | p value* |
|-------------------------------|--------|----------|
| ACE use<br>(n = 26, 16.5%)    | 69 %   | 0.62     |
| No ACE use<br>(n= 131, 83.5%) | 74 %   |          |
| ARB use<br>(n = 17, 11%)      | 71.5 % | 0.8      |
| No ARB use<br>(n=140, 89%)    | 73.5 % |          |

*Online supplements are not copyedited prior to posting.*
